# Supplementary material for: Characterization of Induced High Yielding Cowpea Mutant Lines Using Physiological, Biochemical and Molecular Markers
Source: PubMed Central journal article supplement (PMC7048850; doi:10.1038/s41598-020-60601-6), 2020-02-28
Supplement: 41598_2020_60601_MOESM1_ESM.pdf [file 41598_2020_60601_MOESM1_ESM.pdf]

## **Title: Characterization of Induced High Yielding Cowpea Mutant Lines Using Physiological, Biochemical and Molecular Markers**

Aamir Raina<sup>1,2\*</sup>, Rafiul Amin Laskar<sup>1\*\*</sup>, Younas Rasheed Tantray<sup>3</sup>, Shahnawaz Khursheed<sup>1</sup>, Mohd. Rafiq Wani<sup>1,4</sup>, Samiullah Khan<sup>1</sup>

<sup>1</sup>Mutation Breeding Laboratory, Department of Botany, Aligarh Muslim University, Aligarh, India

<sup>2</sup>Botany Section, Women's College, Aligarh Muslim University, Aligarh, India

<sup>3</sup>Department of Botany, Punjabi University, Patiala, India

<sup>4</sup>Department of Botany, Abdul Ahad Azad Memorial Government Degree College, Srinagar, Jammu and Kashmir, India

Corresponding author: \*aamir854@gmail.com; \*\*rafihkd@gmail.com

**Supplementary Table 1:** Isolation of mutant lines at different doses of gamma rays and sodium azide.

**Supplementary Table 2:** Primer information of genic-SSR markers.

**Supplementary Table 3:** Primer information of CBDP markers.

**Supplementary Fig. 1A:** Field picture showing different treated population sown in RCBD manner: C=Control, G1=100 Gy gamma rays, G2=200 Gy gamma rays, G3=300 Gy gamma rays, G4=400 Gy gamma rays, S1=0.01% SA, S2=0.02% SA, S3=0.03% SA, S4=0.04% SA, G1+S1=100 Gy gamma rays+0.01% SA, G2+S2=200 Gy gamma rays+0.02% SA, G3+S3=300 Gy gamma rays+0.03% SA, G4+S4=400 Gy gamma rays+0.04% SA.

**Supplementary Fig. 1B:** a- Experimental field; b-e-High yield mutant lines.

**Supplementary Figure II.** The full length gel profiles of markers generated using SSR primers VU-1, VU-2, VU-27 and VU-19 respectively in control and M<sub>4</sub> high yielding mutants of cowpea varieties Gomati VU-89 and Pusa-578.

**Supplementary Figure III.** The full length gel profiles of markers generated using SSR primers VU-10, VU-17, VU-42 and VU-47 respectively in control and M<sub>4</sub> high yielding mutants of cowpea varieties Gomati VU-89 and Pusa-578.

**Supplementary Figure IV.** The full length gel profiles of markers generated using SSR primers MB-61, MB-12 and MB-25 respectively in control and M<sub>4</sub> high yielding mutants of cowpea varieties Gomati VU-89 and Pusa-578.

**Supplementary Figure V.** The full length gel profiles of markers generated using SSR primers MB-31, MB-26 and MB-38 respectively in control and M<sub>4</sub> high yielding mutants of cowpea varieties Gomati VU-89 and Pusa-578.

**Supplementary Figure VI.** The full length gel profiles of markers generated using SSR primers MB-13, VU-23, VU-25 and MB-36 respectively in control and M<sub>4</sub> high yielding mutants of cowpea varieties Gomati VU-89 and Pusa-578.

**Supplementary Figure VII.** The full length gel profiles of markers generated using CAAT primers CBDP-17, CBDP-19 and CBDP-16 respectively in control and M<sub>4</sub> high yielding mutants of cowpea varieties Gomati VU-89 and Pusa-578.

**Supplementary Figure VIII.** The full length gel profiles of markers generated using CAAT primers CBDP-12, CBDP-10 and CBDP-25 respectively in control and M<sub>4</sub> high yielding mutants of cowpea varieties Gomati VU-89 and Pusa-578.

**Supplementary Figure IX.** The full length gel profiles of markers generated using CAAT primers CBDP-13, and CBDP-8 respectively in control and M<sub>4</sub> high yielding mutants of cowpea varieties Gomati VU-89 and Pusa-578.

**Supplementary Figure X.** The full length gel profiles of markers generated using CAAT primers CBDP-18, CBDP-20 and CBDP-7 respectively in control and M<sub>4</sub> high yielding mutants of cowpea varieties Gomati VU-89 and Pusa-578.

**Supplementary Figure XI.** The full length gel profiles of markers generated using CAAT primers CBDP-1, CBDP-3 and CBDP-6 respectively in control and M<sub>4</sub> high yielding mutants of cowpea varieties Gomati VU-89 and Pusa-578.

**Supplementary Table 1:** Isolation of mutant lines at different doses of gamma rays and sodium azide.

| STRAIN NUMBER       | ORIGIN/ TREATMENT              | Remarks    |
|---------------------|--------------------------------|------------|
| <b>Gomati VU-89</b> | <b>Gomati VU-89 (Control)</b>  |            |
| Gomati VU-89-A      | 0.02% SA                       | High yield |
| Gomati VU-89-B      | 100Gy $\gamma$ rays+0.01% SA   | High yield |
| Gomati VU-89-C      | 200 Gy $\gamma$ rays           | High yield |
| Gomati VU-89-D      | 200Gy $\gamma$ rays+0.02% SA   | High yield |
| Gomati VU-89-E      | 100Gy $\gamma$ rays            | High yield |
| Gomati VU-89-F      | 200Gy+0.02% SA                 | High yield |
| Gomati VU-89-G      | 100Gy $\gamma$ rays            | High yield |
| <b>Pusa-578</b>     | <b>Pusa-578 (Control)</b>      |            |
| Pusa 578-A          | 0.02% SA                       | High yield |
| Pusa 578-B          | 200Gy $\gamma$ rays + 0.02% SA | High yield |
| Pusa 578-C          | 200Gy $\gamma$ rays            | High yield |
| Pusa 578-D          | 100 Gy $\gamma$ rays +0.01% SA | High yield |

**Supplementary Table 2:** Primer information of genic-SSR markers.

| NAME  | Primer sequence (forward) | Primer sequence (reverse) |
|-------|---------------------------|---------------------------|
| VU-1  | AACAAGATGTGGCATGCTGA      | TGAAAACGGAAAAGGGATCA      |
| VU-2  | GAAACTAGCACAAATCCAACA     | GAGCAAAAAGCCTCCATCACT     |
| VU-3  | GCACCCAATCAAACACACAC      | GAAGCGGATTTGAGAGTTGG      |
| VU-8  | TCAAAAACACAGGTCTCCA       | CATCCCGTGAAATTCAACAA      |
| VU-10 | TCAAAACTTCAACCCAGACA      | AAAAGGAAGTCCATTGCTC       |
| VU-17 | GGATATCATAGCAAGTCGAA      | AAGGAGTGCATCCTAAACTC      |
| VU-19 | AGAACCCAGCATACTGCAT       | CCTCGCCAATGATTCTGAG       |
| VU-23 | CGTACCTAATGTGAAGGTTTCGTT  | AAGGCAAAAAGCTCTTGACAG     |
| VU-25 | AGGGATGAGTTCCTTCAACG      | AAGAAGTGGTGAGGGCACAG      |
| VU-27 | TCCATCCACCATTTCCATC       | ATGGGAATGCCCGAGAGT        |
| VU-29 | TTTTTCTCGACACACGGTGA      | TTCCCCCTCTCTCACACAC       |
| VU-42 | ATGTTATACGCCGCAAAGT       | TCTGGGTGCTTTGGAAAATC      |

|       |                         |                            |
|-------|-------------------------|----------------------------|
| VU-47 | TGTTTTTCGCTATGCCTCAA    | GGCAGCTAGATTCGTCCTTG       |
| VU-53 | CATTCCACGATACATACATACCC | CGTGAAAGGATCTGAATTGG       |
| VU-61 | ACCCAACCCTTCTCATAGGG    | CAACACTGCTCGATCCTCCT       |
| VU-62 | TTGTCAAAAATCAGAAGCTC    | CTTGCATTCACTTCTACCAC       |
| VU-94 | CAACCCCATCACTGTGTCAG    | GATGCAAGGAGAAGGAGCAG       |
| VU-95 | CCCAAGAGATTTGCTCTGAA    | AAACAACAGGGAATTTGCAG       |
| MB-1  | AGAAGGCCTGCAAGTGGA      | TCTCTGCAATGCACAAGTCT       |
| MB-2  | TGGCAAACCCCATATTTACCA   | AGGAAGCAAGTAGGGGGTTTG      |
| MB-3  | AAGAACTCCGCCGGAAGTAC    | TCTTGACGCGTTCCTGATGT       |
| MB-4  | TGCCCTCTGTTATGGTGGAG    | AGTTGCATCGGCCTCATCTC       |
| MB-5  | AGCACCCAGCTTGAAGAAA     | TGCTTTGCGGCAAATTTCCA       |
| MB-6  | GCAGAAGGAAGCTCAAGATCG   | GCTTCCCACAACCTCCAGAA       |
| MB-7  | AACGACTGCAATGCACAACC    | GAGTTGTCTGAGGCTGAGGG       |
| MB-8  | TCGGTGTGTCGTTGATTGGA    | CAGCAATTGAAACATTTGTTCGA    |
| MB-9  | TGCCTCATGAGGGAAATCAACA  | ACACACACTTACTGCGAAGT       |
| MB-10 | AGGAGCCAACAACAAACCCA    | AGCAACGCCATCATCATCCA       |
| MB-11 | AGAACCATGCCACGTGACAT    | GTCCAACCACGCAAACCTCAC      |
| MB-12 | GATCGGCCTCATGCTCCTTT    | GTGGTGGTGAGAGTGGGAAG       |
| MB-13 | AGATCCCATGCTCGCTTCTG    | CAGCTTGCTTTCCTTGCTG        |
| MB-14 | GGCCCAGTGAATACTATCTCC   | AGGTAAACCAATAAACCATTTTCCT  |
| MB-15 | GGCACACTCATGGACCTTCA    | ATACCACTCTGAGCAACGGC       |
| MB-16 | AACGCCATAGGATTCATTCGA   | AGCGTGAACGATCTTATTATTACCA  |
| MB-17 | CGCAAATGGAAACCCACCAG    | TTATGCCACGAGCTTCGAGC       |
| MB-18 | ACGTGTAGAGAGACCACCGA    | CCAAGCAGCAGAACCAACAC       |
| MB-19 | TGGACCTTTTTCCCATTCATCT  | AGTGCAGGCAGGAGCAAATA       |
| MB-20 | AAGCAAGATGACACGGAGCA    | ATGGTTGAAGAAGCGGGAGG       |
| MB-21 | ATTGCCACCCCATTTCCAT     | AGCAGTCCACCACTCTCTCT       |
| MB-22 | GCCATCACCAACTACCCCTC    | AGGGGAGGGCGTAGATGTAG       |
| MB-23 | AAGGAGGGATTCTCGCCTCT    | TGGTACCCGAACCTTCTTGGC      |
| MB-24 | AAACAGTCAGAGAGGTTTGCA   | AAGCCACGACGATGAGGTTT       |
| MB-25 | ATGTCTGCATCATGGGAGCC    | CCCAACAACAGCAGCAATC        |
| MB-26 | ACCCTATGTGCAGTGCAACA    | TCTCCTCCCTTGAGAGAGGC       |
| MB-27 | ATCAACCATGGCTGCCTCAT    | GCTGACTGGAAGAAGAGCGT       |
| MB-28 | ACGAAATCAACGAGGCATATGA  | ACTTTTGTTGCGGAGGGGAA       |
| MB-29 | AGTAGAGAACGCTCGGAGGT    | TCCAGTGTAACCTACCGCCAC      |
| MB-30 | AAGCGTGGAAGTGGAGTGAG    | ACCGACTTAACGTTATTGAAAAGAGG |
| MB-31 | GGGTGGGGAAAGGGAAGAAG    | ACGCATACACACGCAGAGAA       |
| MB-32 | AAGACGACTGGACGATTCCG    | CCGTCTTCGTGTTTCCTCCA       |
| MB-33 | TGGTTCGGTGTGTTAGTGTCCG  | TGCATGGTGAAACCTTATCGT      |

|       |                          |                            |
|-------|--------------------------|----------------------------|
| MB-34 | CTCCTGAGGGCACTGAACTG     | GCTTCTGCAACGAGTTTCAACT     |
| MB-35 | CTCAACAAGTTCCTCAGCGC     | CCAGAACCGGTGGAAGTCTC       |
| MB-36 | CCCAACCTCTCCGCAAAGAT     | ACAGCCAATCCACGTACCTC       |
| MB-37 | ATCCTTCGTGGTCTCCGAGA     | GGGGTTACAGGACCAGAAGC       |
| MB-38 | CCTCCCTCTCCCTCTTCCTC     | TGGGATTCCGGGCAAATCTT       |
| MB-39 | CAGATTCCAACCCGAAGCCA     | GCGAAAGAAGCTCGTCCTCT       |
| MB-40 | AAGAGAAGGGGTTCGTGCTC     | AGGGCGAGAGAATCAAACCG       |
| MB-41 | AAGAAGGAAGCTCCAAGGCC     | GCAGCCACGTGTTGCATTAT       |
| MB-42 | AAGAAAGGTGGAGGAGCGTG     | ACCTCAACTTCTTCCATTTTTCAACT |
| MB-43 | GCTTAACTTCAACGGCACCC     | TTAGCCCTTCCGTTTCGCTT       |
| MB-44 | CTCCTGGGCACATTTCCACT     | ACCACCCACATCATTTCCCC       |
| MB-45 | ACAGGCATTATGATACTTTCTGCA | GAAACTGCACAGCACTTGGT       |
| MB-46 | TTGTGGTGTCCGTAGTGAGC     | TCGCTTCGGAAAGTGCTTCT       |
| MB-47 | ACCAAGAACAGAGCCAGAGC     | GTTTTCCACTCCGATGCGTG       |
| MB-48 | GCAAATTGCAGCTCACATCG     | TCTCGGAAGATTGGCTGGTT       |
| MB-49 | CCTTGCTCTTGTGTGCCTCT     | CTCCACAGCATTGACCCCAT       |
| MB-50 | ACTGAGTCTCACCAGAGCCA     | ATTCTCCGGCACTCAACAGG       |
| MB-51 | TCCGTGTTCTTAGCCAAGATCA   | CTTGGCTGCAGCTGAAGTTC       |
| MB-52 | ACGCGTTGGGAAGGTTAAGA     | GAAATTCCGATGCCCATGCC       |
| MB-53 | TGGCATTCTCCCAATTCCCT     | TCCTCCTGATTGGACCTCTCA      |
| MB-54 | ACAGTGCTCCACAACAAGGA     | GCGCTGATAGAGGCAGACTT       |
| MB-55 | CCTGCCACCCATCGACTTTA     | GCAGTGGAGAAATGGTGACC       |
| MB-56 | CCCTCACAAACTCGAGACCC     | GAAACGAAGGTGGCTGAGGA       |
| MB-57 | GCCATTGTAGAAACCCACG      | ATATTGGGTGCTGCCGGTAC       |
| MB-58 | ATTTCCCTGTGCGCCATAA      | TCTGTTATGCAGCAGGCTCC       |
| MB-59 | AGAGGCCATGGTAGAAGGGT     | AGCCTTGGAGCTGGTTGATG       |
| MB-60 | CCGGCATGTTAAGGTGGTCT     | GAAGGTCATGACGAGGCCAA       |
| MB-61 | AGGCTGATTACAATGGCAAGGA   | GGATCTGCACACACACATGC       |
| MB-62 | AGCAGGTTTCTTCTCACCGG     | AGGAATTAGGGTTTGGGCGG       |
| MB-63 | GTCCGGATTGAAGGGTCACA     | TATCCGAGAATCACCCCGT        |
| MB-64 | CATGGGTCATGCACTTTCGT     | CGCATCCATTGAAGACCAAGC      |
| MB-65 | AACCTTCCAGGAATGCCAGG     | TTGCTTGACCTCTGCCTCAG       |
| MB-66 | AGTTAACTCACCCTCGCG       | TCAGCTTCGGAGTCGCATT        |

**Supplementary Table 3:** Primer information of CBDP markers.

| Primer ID | Primer Sequence <sup>a</sup> |
|-----------|------------------------------|
| CAAT1     | <u>TGAGCACGATCCAAT</u> AGC   |
| CAAT2     | <u>TGAGCACGATCCAATAAT</u>    |
| CAAT3     | <u>TGAGCACGATCCAAT</u> ACC   |
| CAAT4     | <u>TGAGCACGATCCAAT</u> AAG   |
| CAAT5     | <u>TGAGCACGATCCAAT</u> CTA   |
| CAAT6     | <u>TGAGCACGATCCAAT</u> CAG   |
| CAAT7     | <u>TGAGCACGATCCAAT</u> CGA   |
| CAAT8     | <u>TGAGCACGATCCAAT</u> CGG   |
| CAAT9     | <u>TGAGCACGATCCAAT</u> GAT   |
| CAAT10    | <u>TGAGCACGATCCAAT</u> GTT   |
| CAAT11    | <u>TGAGCACGATCCAAT</u> TGC   |
| CAAT12    | <u>TGAGCACGATCCAATATA</u>    |
| CAAT13    | <u>TGAGCACGATCCAATGAG</u>    |
| CAAT14    | <u>TGAGCACGATCCAATGCG</u>    |
| CAAT15    | <u>TGAGCACGATCCAATTGA</u>    |
| CAAT16    | <u>TGAGCACGATCCAATTCA</u>    |
| CAAT17    | <u>TGAGCACGATCCAATTTG</u>    |
| CAAT18    | <u>CTGAGCACGATCCAATAG</u>    |
| CAAT19    | <u>CTGAGCACGATCCAATAC</u>    |
| CAAT20    | <u>CTGAGCACGATCCAATAT</u>    |
| CAAT21    | <u>CTGAGCACGATCCAATCA</u>    |
| CAAT22    | <u>CTGAGCACGATCCAATCG</u>    |
| CAAT23    | <u>CTGAGCACGATCCAATGG</u>    |
| CAAT24    | <u>CTGAGCACGATCCAATGA</u>    |
| CAAT25    | <u>CTGAGCACGATCCAATGT</u>    |

**Appendix I:** Reagents used for the estimation of NRA, chlorophyll and carotenoid contents and mineral elements.

---

**(A) 0.1M phosphate buffer (7.4 pH)**

27.2 g of KH<sub>2</sub>PO<sub>4</sub> and 45.63 g of K<sub>2</sub>HPO<sub>4</sub>·7H<sub>2</sub>O were dissolved separately in 1000 ml of DDW.

The above solution of KH<sub>2</sub>PO<sub>4</sub> and K<sub>2</sub>HPO<sub>4</sub>·7H<sub>2</sub>O were mixed in the ratio of 36:64, respectively.

---

**(B) 0.2M potassium nitrate**

20.2 g of KNO<sub>3</sub> was dissolved in sufficient DDW and final volume was made upto 1000 ml using

DDW

---

**(C) Isopropanol (5%)**

5 ml of isopropanol was pipette into sufficient DDW and final volume was made upto 100 ml, using DDW.

---

**(D) Sulphanilamide (1%)**

1 g of sulphanilamide was dissolved in 100 ml of 3N HCL.

3N HCL was prepared by dissolving 25.86 ml of HCl in sufficient DDW and final volume was maintained to 100 ml, using DDW.

---

**(E) N-1-nethyl-ethylenediamine dihydro chloride-HCl (NED-HCl) (0.02%)**

20 mg of NED-HCl was dissolved in sufficient DDW and final volume was made upto 100 ml, using DDW.

---

**(F) Acetone (80%)**

80% acetone was prepared bu mixing 80 ml of acetone with 20 ml of DDW.

---

**Appendix II: Reagents and components used in SDS-PAGE.**

**(A) Separating gel: (10% ) (for 5 ml)**

- i. 2 ml ddH<sub>2</sub>O
  - ii. 1.67 ml 30% acrylamide/Bis
  - iii. 1.25 ml 1.5 M Tris (pH 8.8)
  - iv. 25 µl 20% SDS
  - v. 25 µl 10% ammonium persulphate
  - vi. 2.5 µl TEMED
- 

**(B) Stacking gel: (5 %) (for 3 ml)**

- vii. 2.088 ml dH<sub>2</sub>O
  - viii. 0.506 ml 30% acrylamide/Bis
  - ix. 0.375 ml 1 M Tris (pH 6.8)
  - x. 15 µl 20% (w/v) SDS
  - xi. 15 µl 10% ammonium persulphate
  - xii. 1.5 µl TEMED
- 

**(C) SDS protein sample buffer: (2X)**

- xiii. 1.25 ml 1 M Tris HCl (pH 6.8)
  - xiv. 4.0 ml 10% (w/v) SDS
  - xv. 2.0 ml glycerol
  - xvi. 0.5 ml 0.5 M EDTA
  - xvii. 4 mg bromophenol blue
  - xviii. 0.2 ml 14.3 M β-mercaptoethanol
  - xix. Bring the volume to 10 ml by adding ddH<sub>2</sub>O
- 

**(D) Running buffer: (10X)**

- xx. 30.30 g Tris-base
  - xxi. 144.0 g glycine
  - xxii. 10.0 g SDS
  - xxiii. Completely dissolve it in 800 ml ddH<sub>2</sub>O and then bring the final volume to 1000 ml by adding more ddH<sub>2</sub>O
-

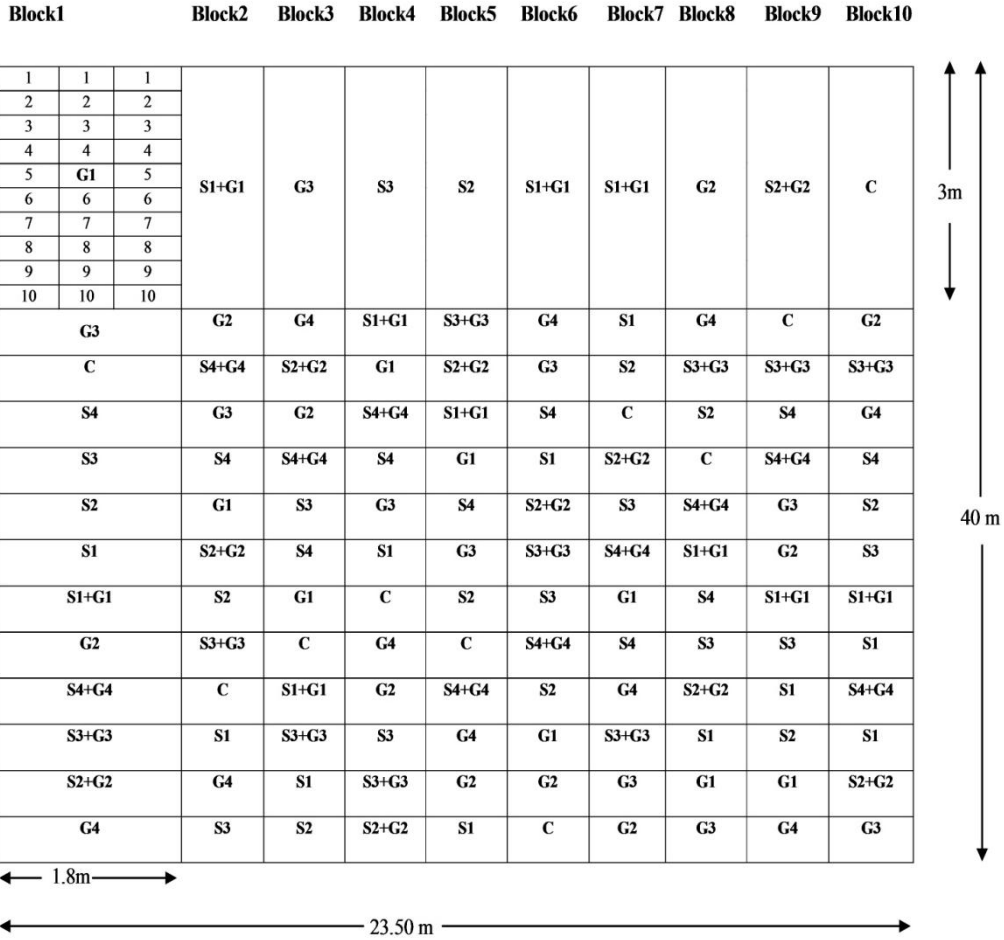

**Supplementary Fig. 1A:** Field picture showing different treated population sown in RCBD manner: C=Control, G1=100 Gy gamma rays, G2=200 Gy gamma rays, G3=300 Gy gamma rays, G4=400 Gy gamma rays, S1=0.01% SA, S2=0.02% SA, S3=0.03% SA, S4=0.04% SA, G1+S1=100 Gy gamma rays+0.01% SA, G2+S2=200 Gy gamma rays+0.02% SA, G3+S3=300 Gy gamma rays+0.03% SA, G4+S4=400 Gy gamma rays+0.04% SA.

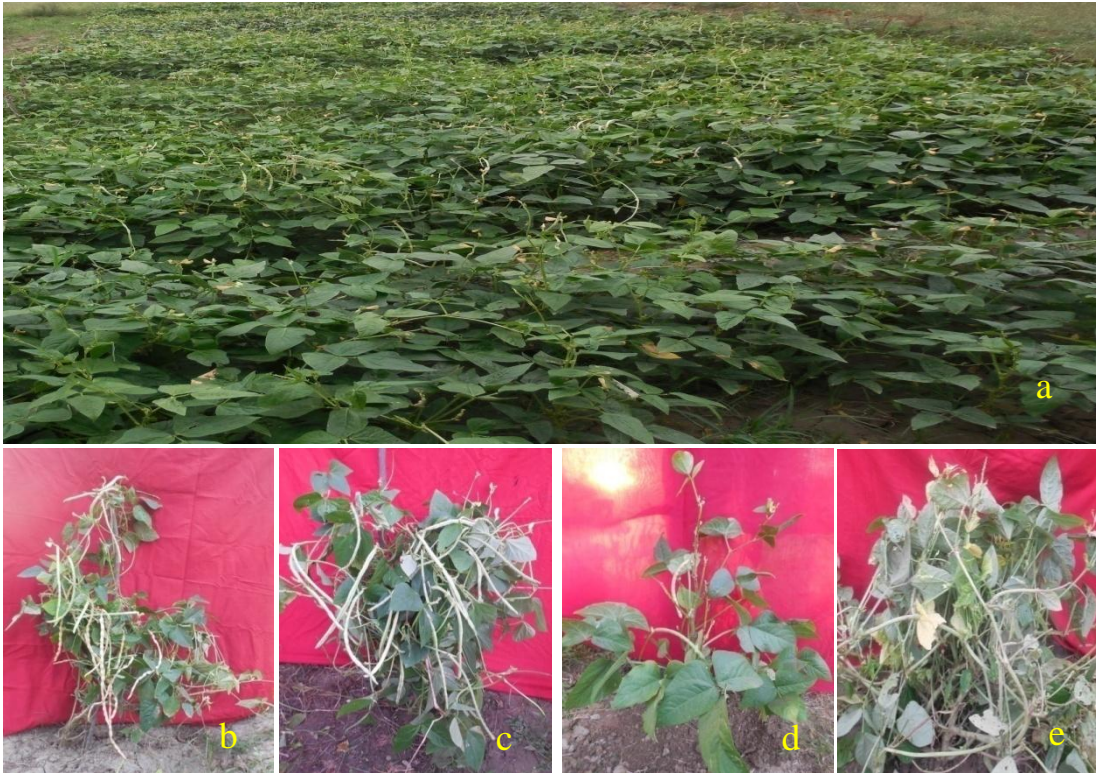

**Supplementary Fig. 1B:** a- Experimental field; b-e-High yield mutant lines.

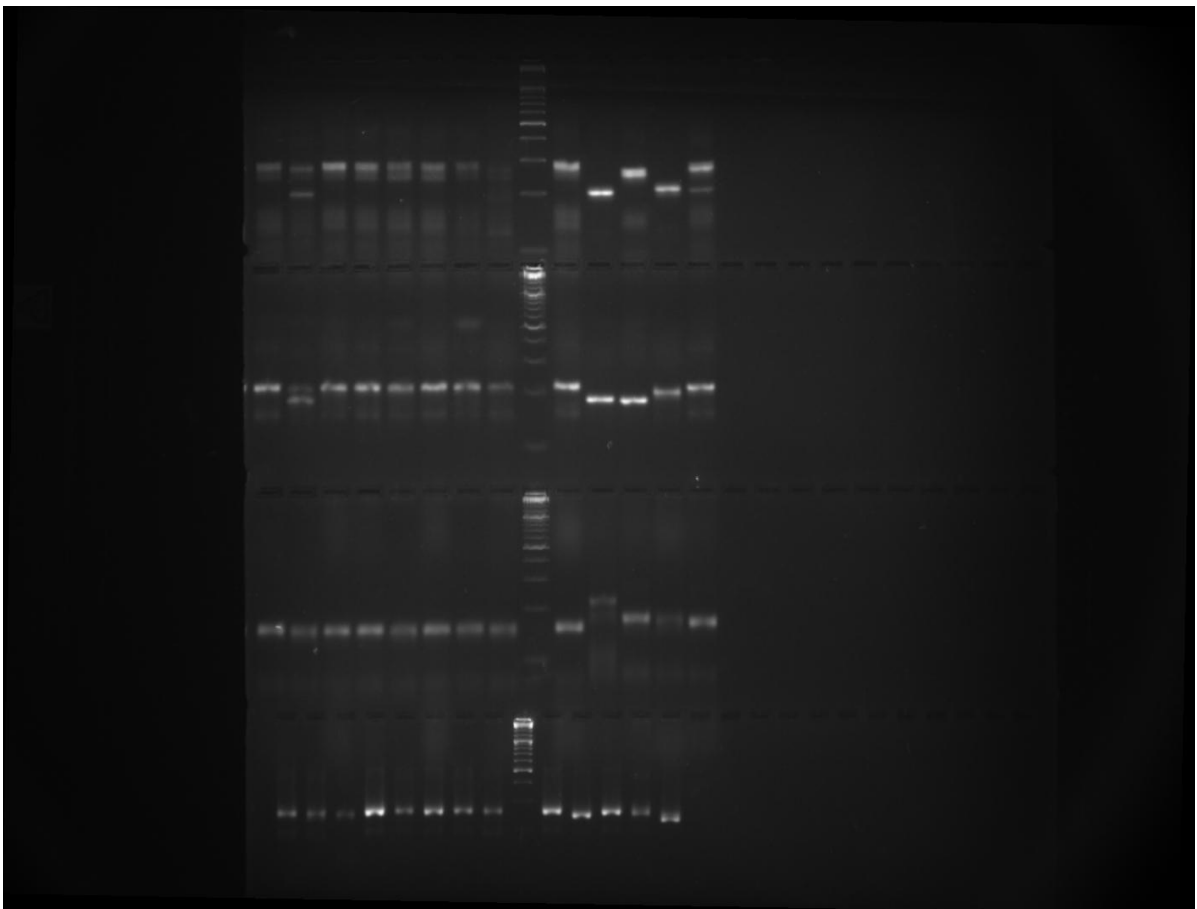



**Supplementary Figure II.** The full length gel profiles of markers generated using SSR primers VU-1, VU-2, VU-27 and VU-19 respectively in control and M<sub>4</sub> high yielding mutants of cowpea varieties Gomati VU-89 and Pusa-578.

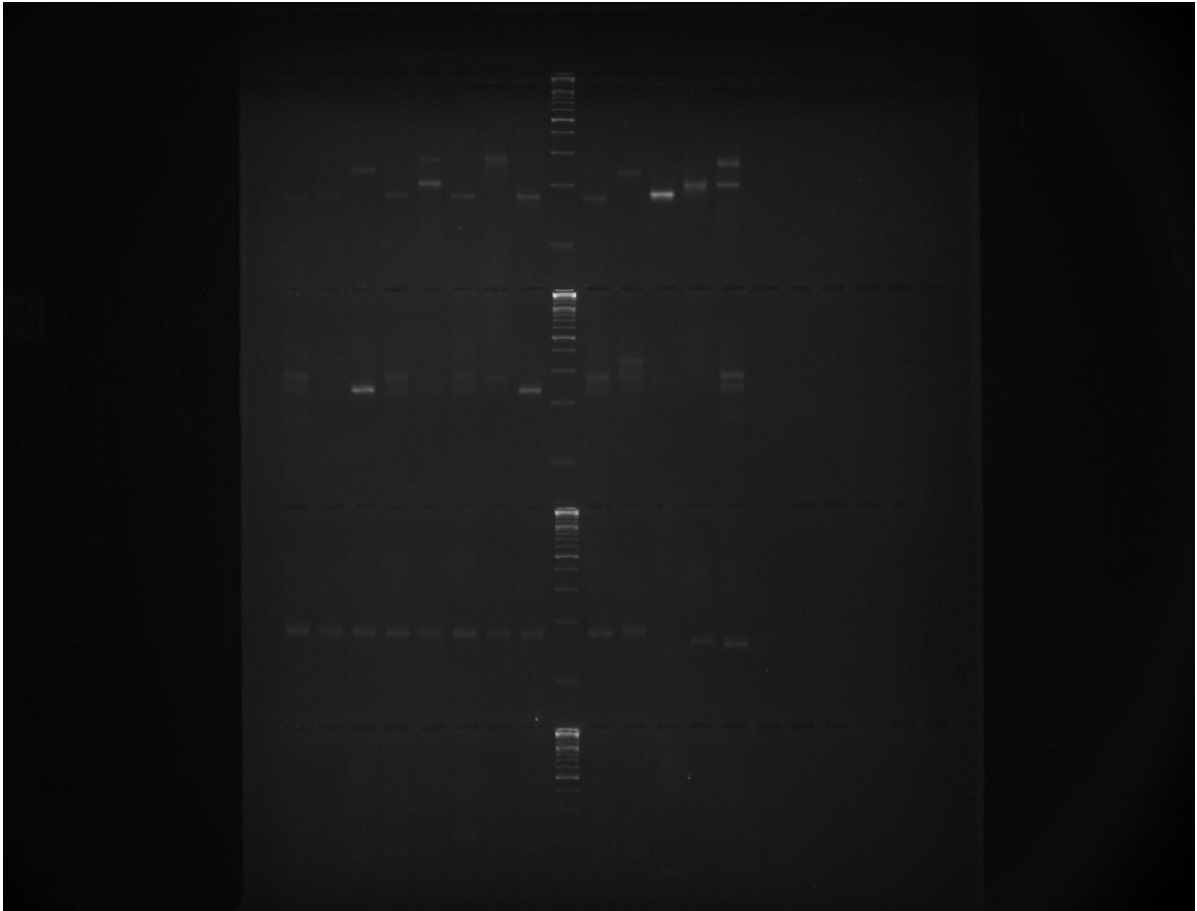

**Supplementary Figure III.** The full length gel profiles of markers generated using SSR primers VU-10, VU-17, VU-42 and VU-47 respectively in control and M<sub>4</sub> high yielding mutants of cowpea varieties Gomati VU-89 and Pusa-578.

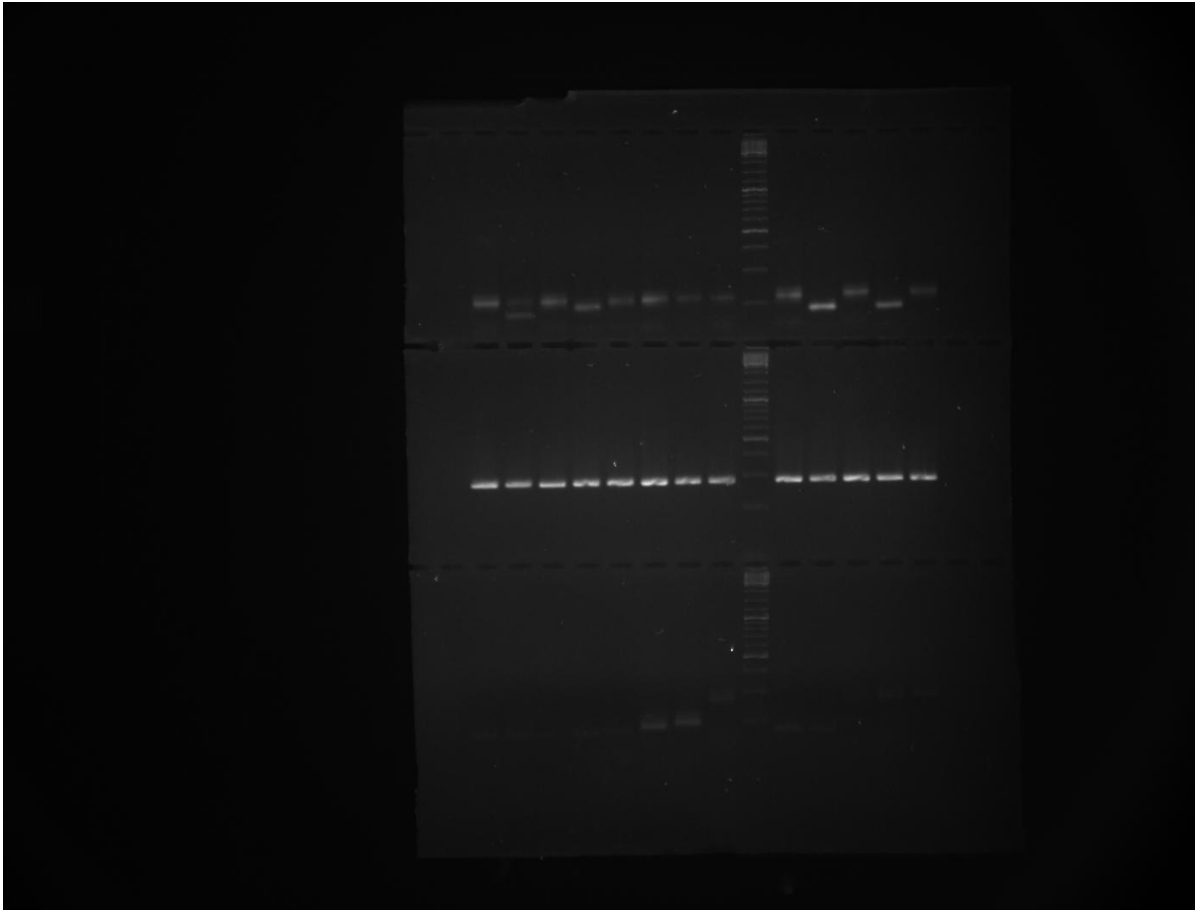

**Supplementary Figure IV.** The full length gel profiles of markers generated using SSR primers MB-61, MB-12 and MB-25 respectively in control and M<sub>4</sub> high yielding mutants of cowpea varieties Gomati VU-89 and Pusa-578.

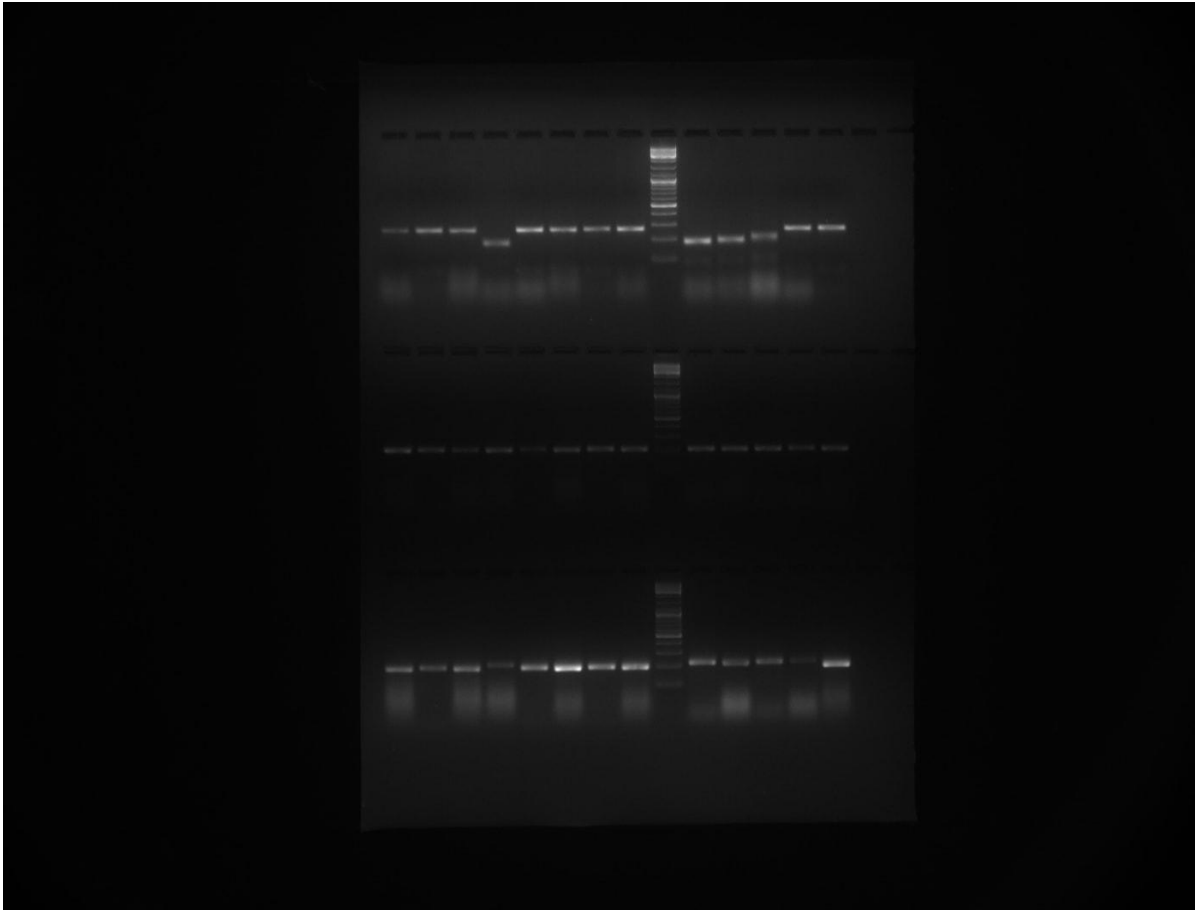

**Supplementary Figure V.** The full length gel profiles of markers generated using SSR primers MB-31, MB-26 and MB-38 respectively in control and M<sub>4</sub> high yielding mutants of cowpea varieties Gomati VU-89 and Pusa-578.

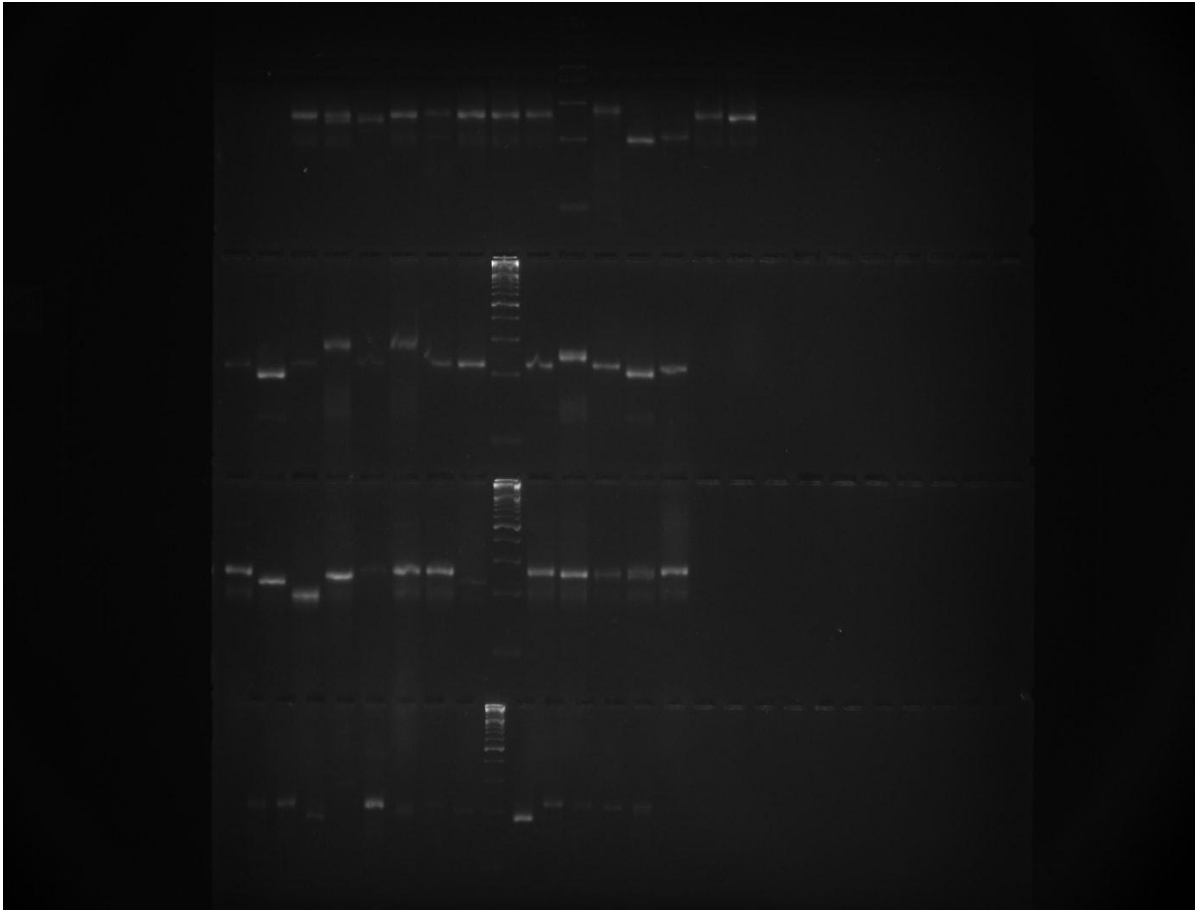

**Supplementary Figure VI.** The full length gel profiles of markers generated using SSR primers MB-13, VU-23, VU-25 and MB-36 respectively in control and M<sub>4</sub> high yielding mutants of cowpea varieties Gomati VU-89 and Pusa-578.

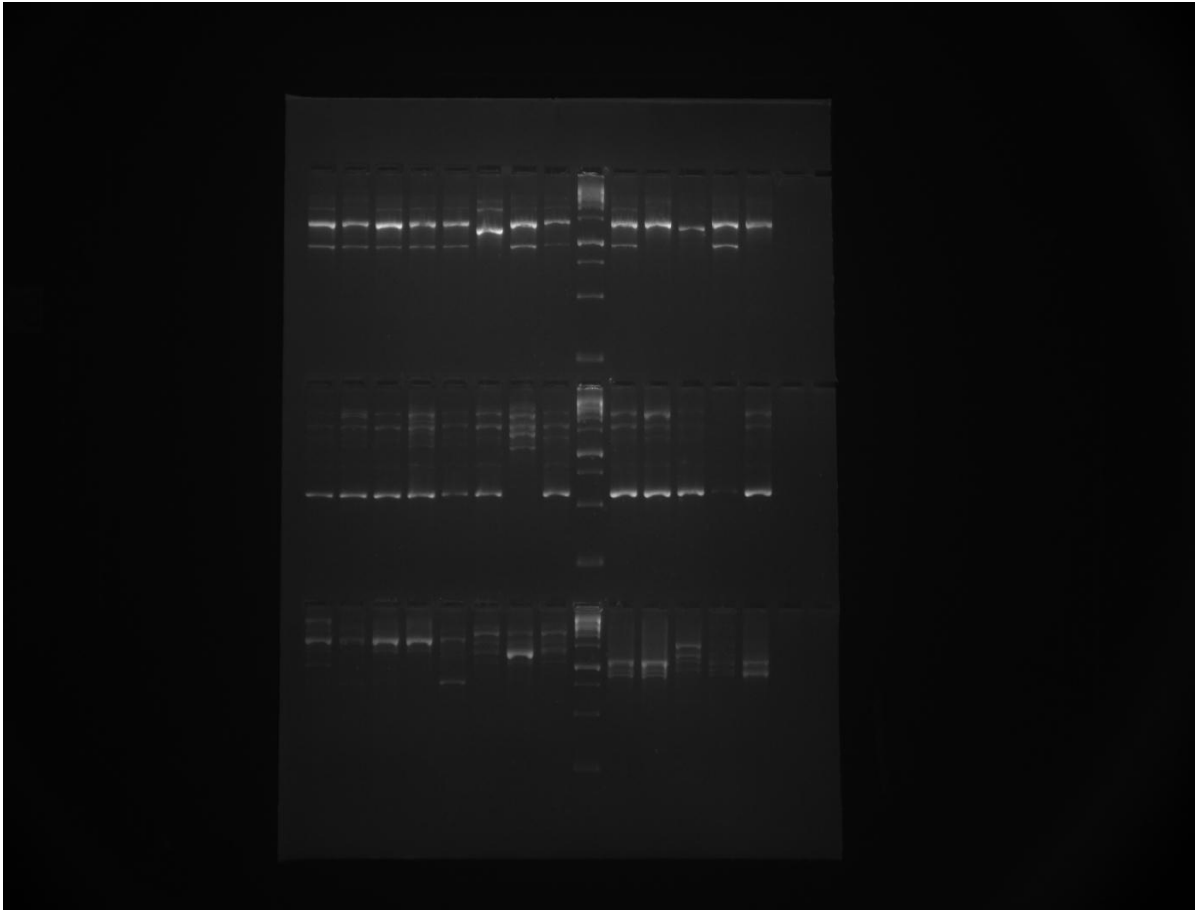

**Supplementary Figure VII.** The full length gel profiles of markers generated using CAAT primers CBDP-17, CBDP-19 and CBDP-16 respectively in control and M<sub>4</sub> high yielding mutants of cowpea varieties Gomati VU-89 and Pusa-578.

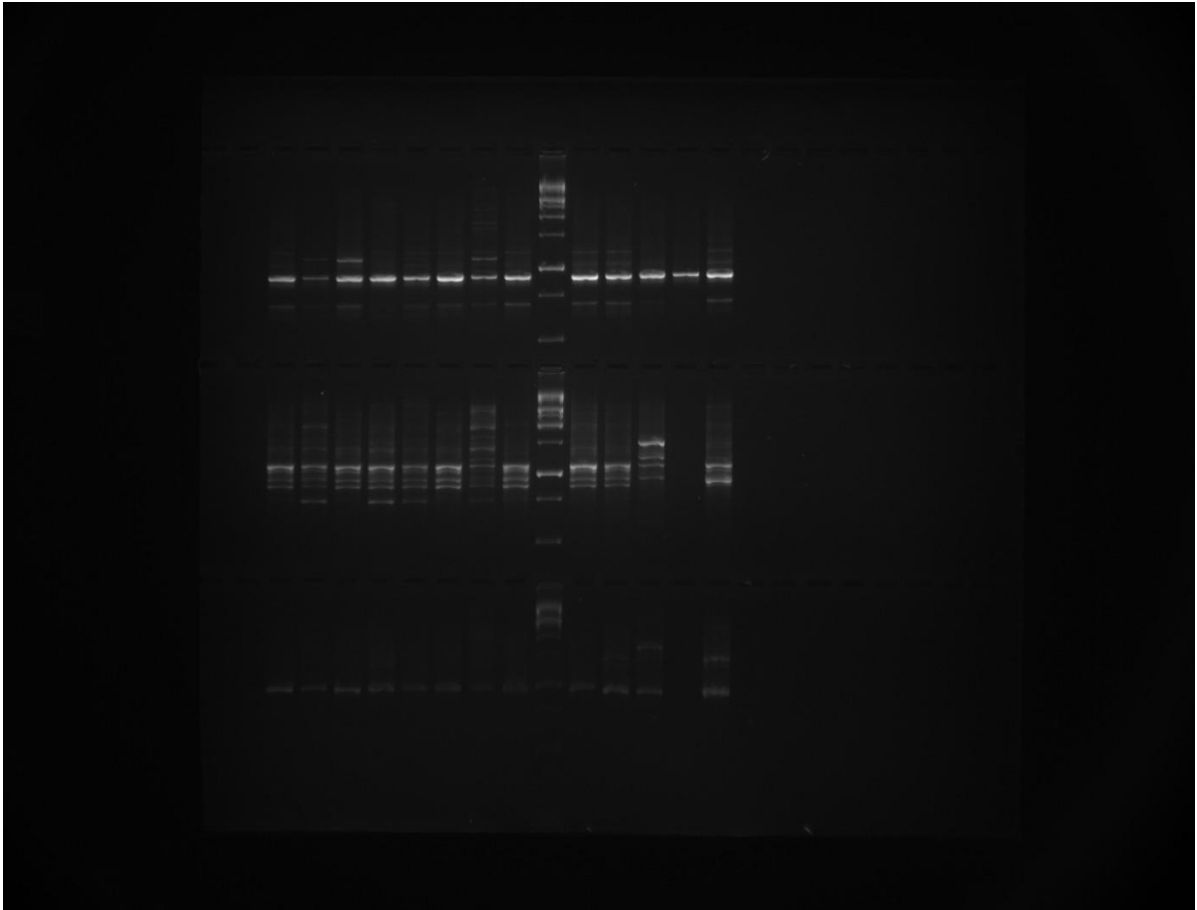

**Supplementary Figure VIII.** The full length gel profiles of markers generated using CAAT primers CBDP-12, CBDP-10 and CBDP-25 respectively in control and M<sub>4</sub> high yielding mutants of cowpea varieties Gomati VU-89 and Pusa-578.

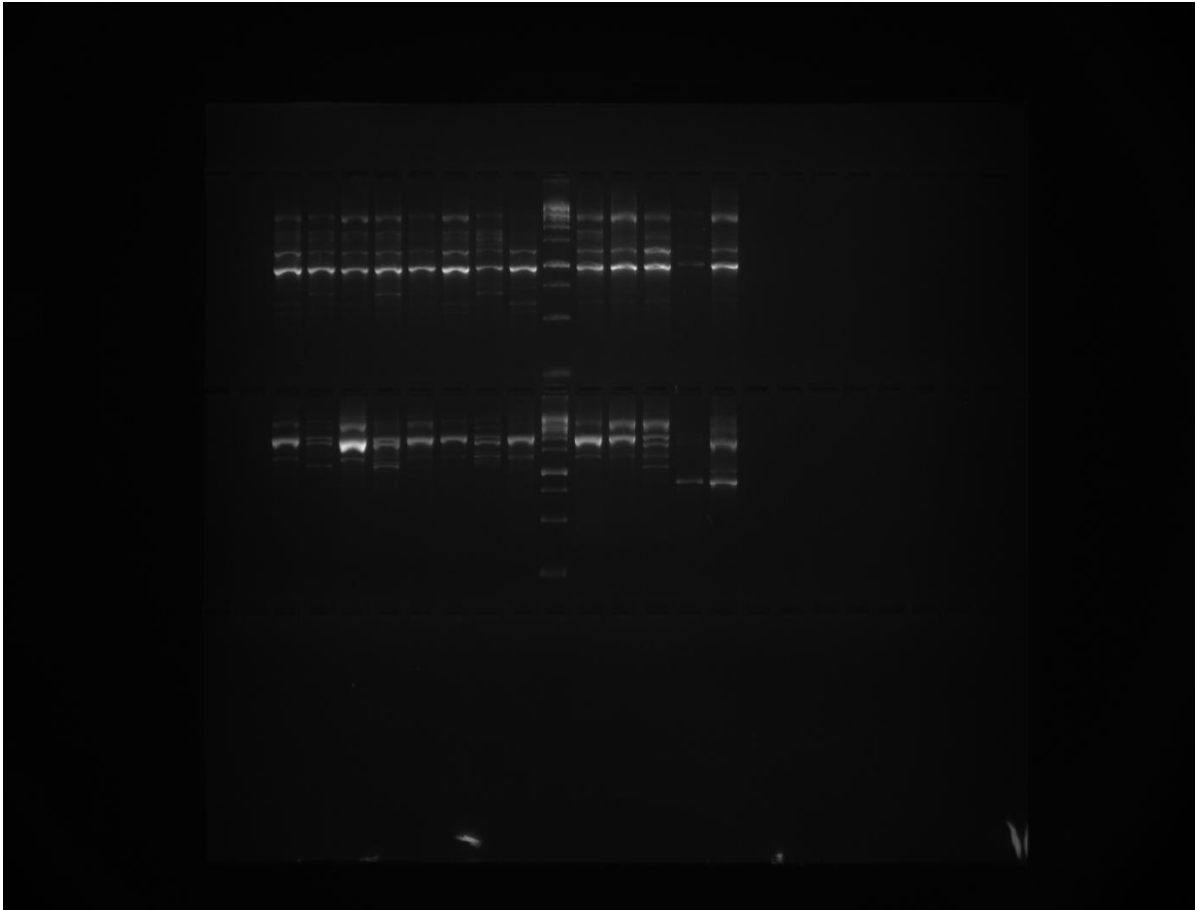

**Supplementary Figure IX.** The full length gel profiles of markers generated using CAAT primers CBDP-13, and CBDP-8 respectively in control and M<sub>4</sub> high yielding mutants of cowpea varieties Gomati VU-89 and Pusa-578.

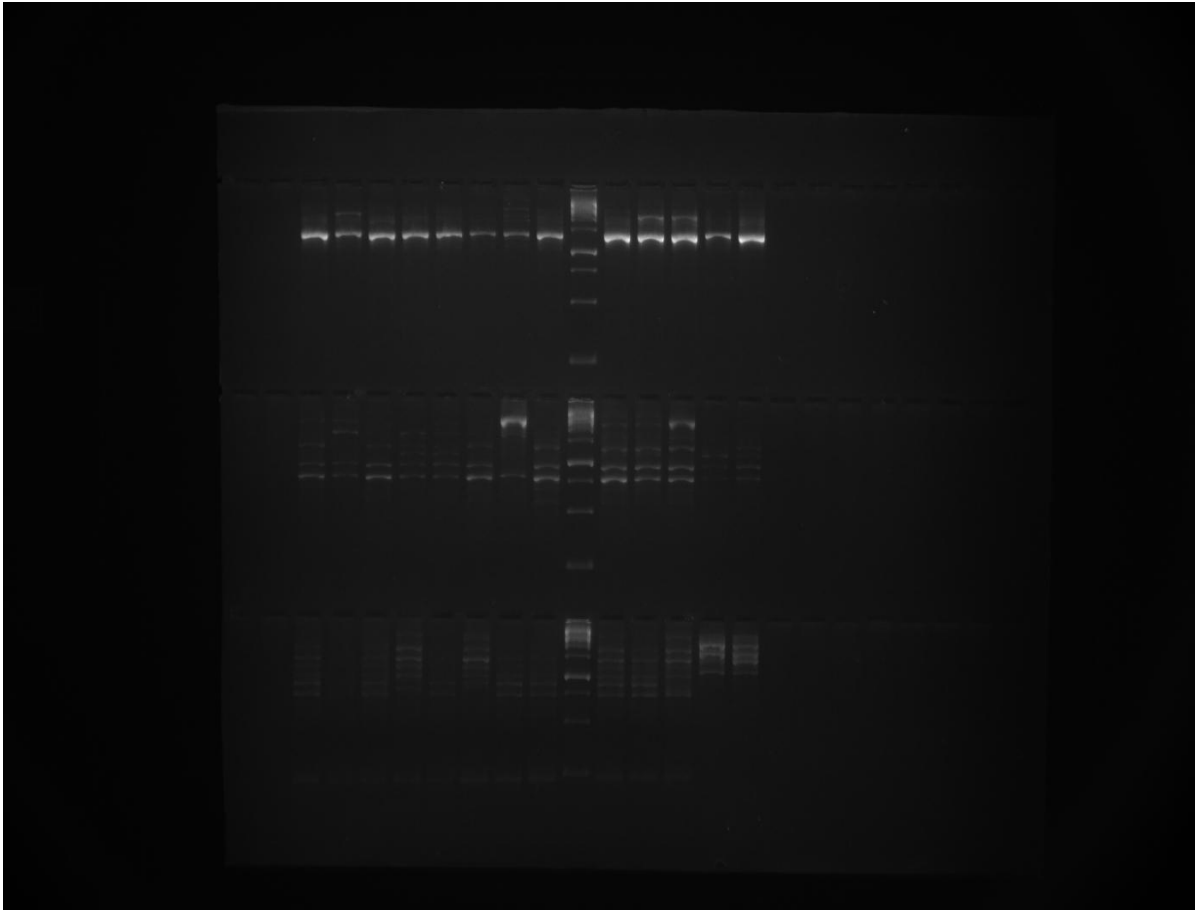

**Supplementary Figure X.** The full length gel profiles of markers generated using CAAT primers CBDP-18, CBDP-20 and CBDP-7 respectively in control and M<sub>4</sub> high yielding mutants of cowpea varieties Gomati VU-89 and Pusa-578.



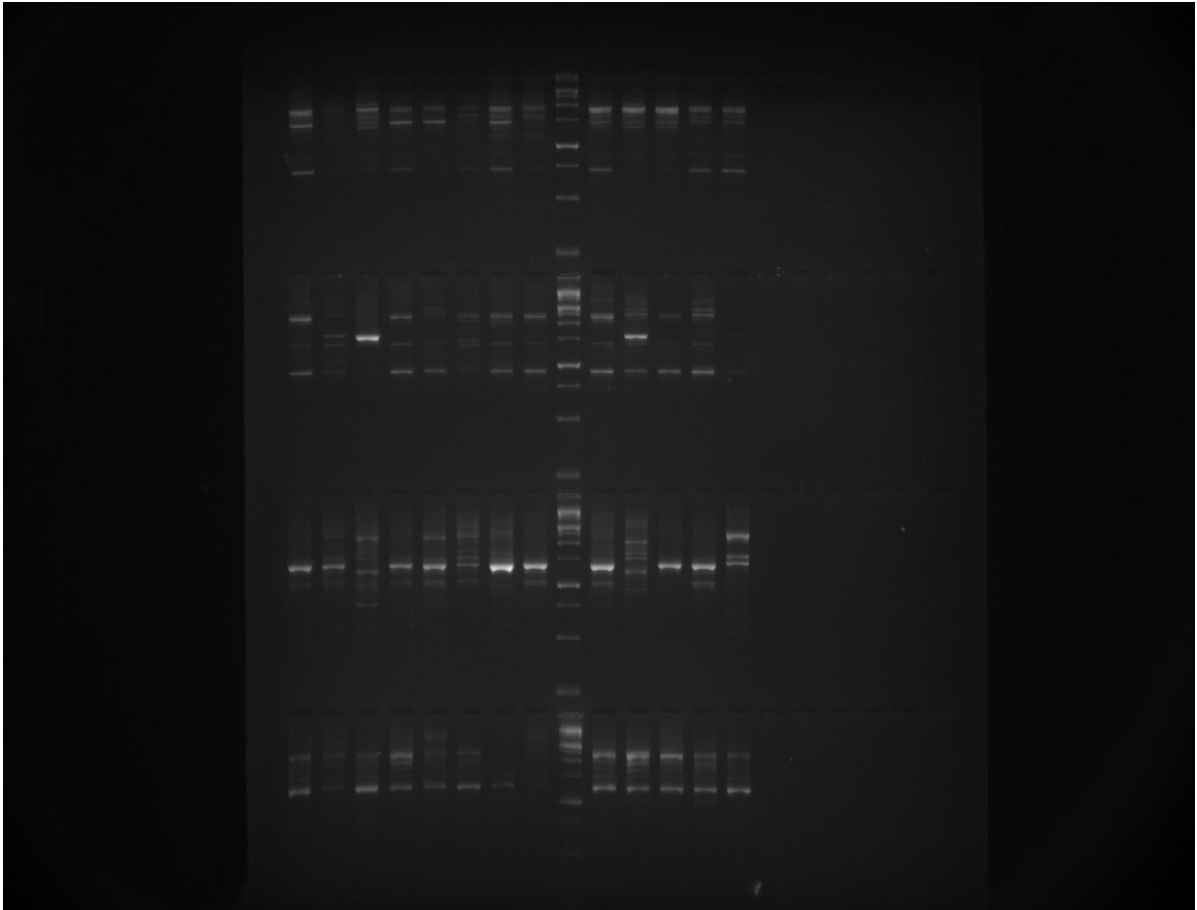

**Supplementary Figure XI.** The full length gel profiles of markers generated using CAAT primers CBDP-1, CBDP-3 and CBDP-6 respectively in control and M<sub>4</sub> high yielding mutants of cowpea varieties Gomati VU-89 and Pusa-578.
